# Supplementary material for: Different distribution of histone modifications in genes with unidirectional and bidirectional transcription and a role of CTCF and cohesin in directing transcription
Source: PubMed Central journal article supplement (PMC4446127; doi:10.1186/s12864-015-1485-5), 2015-04-15

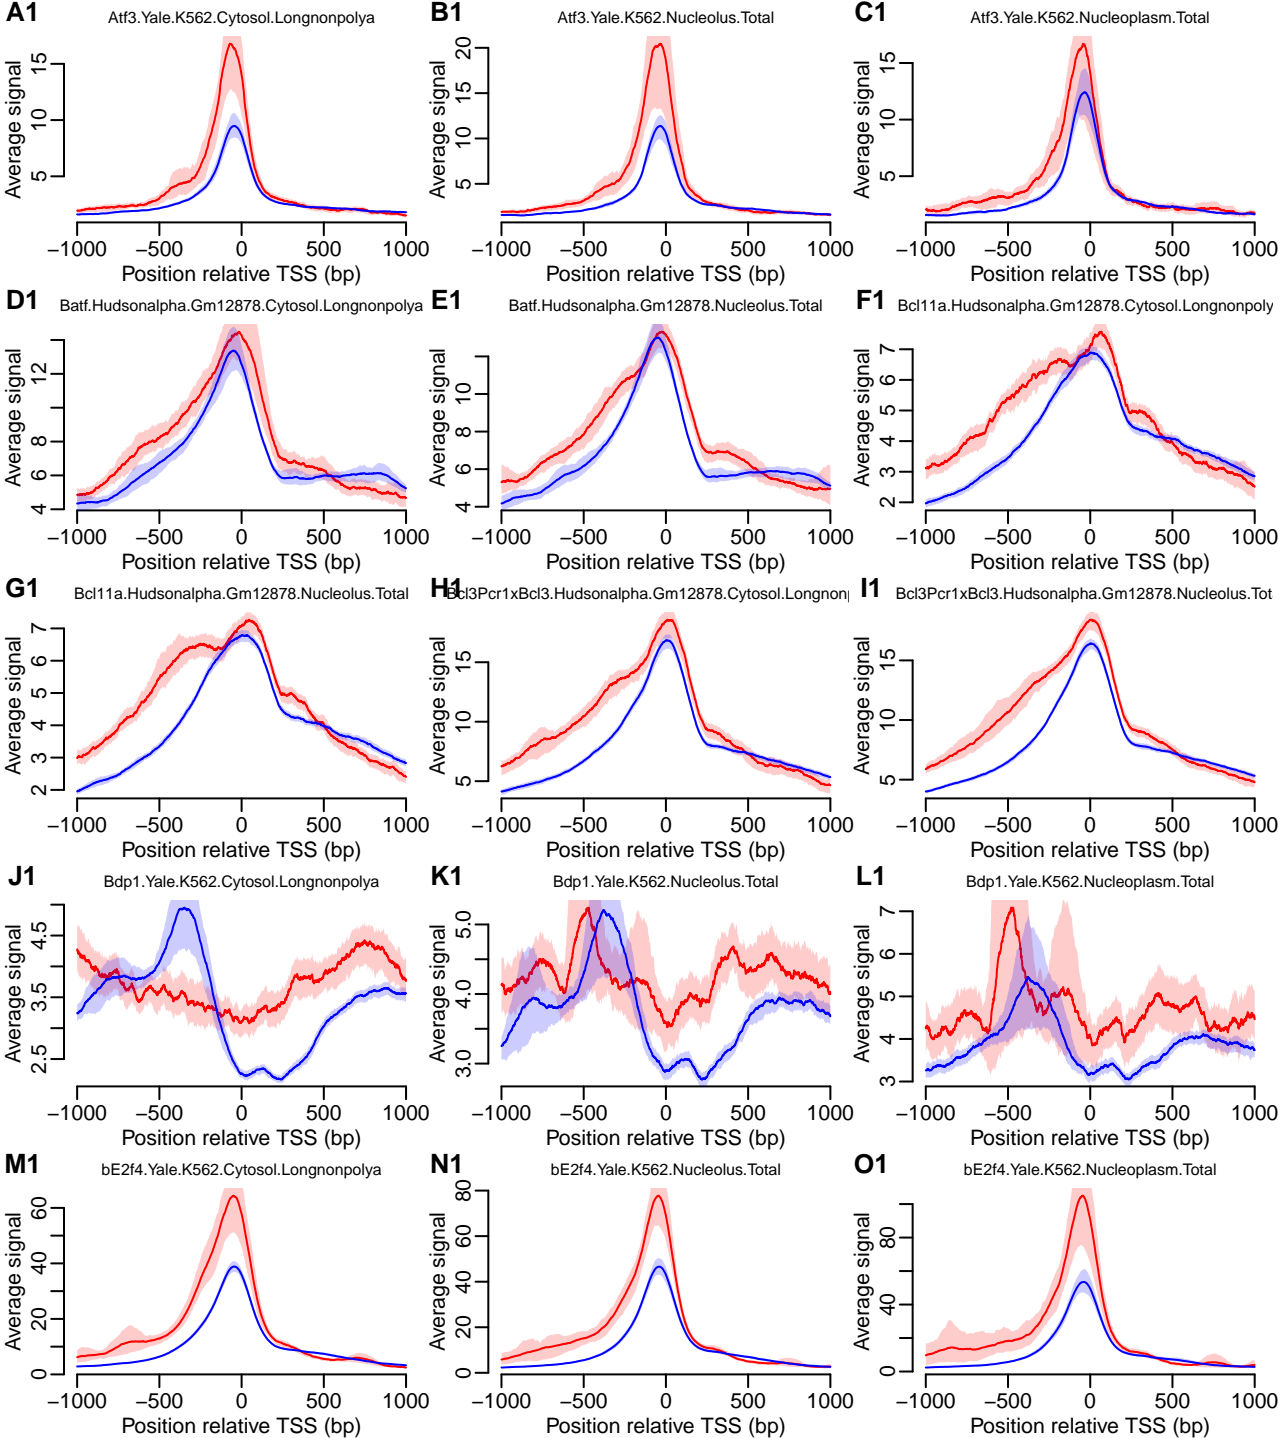

— Bidirectional genes

— Unidirectional genes

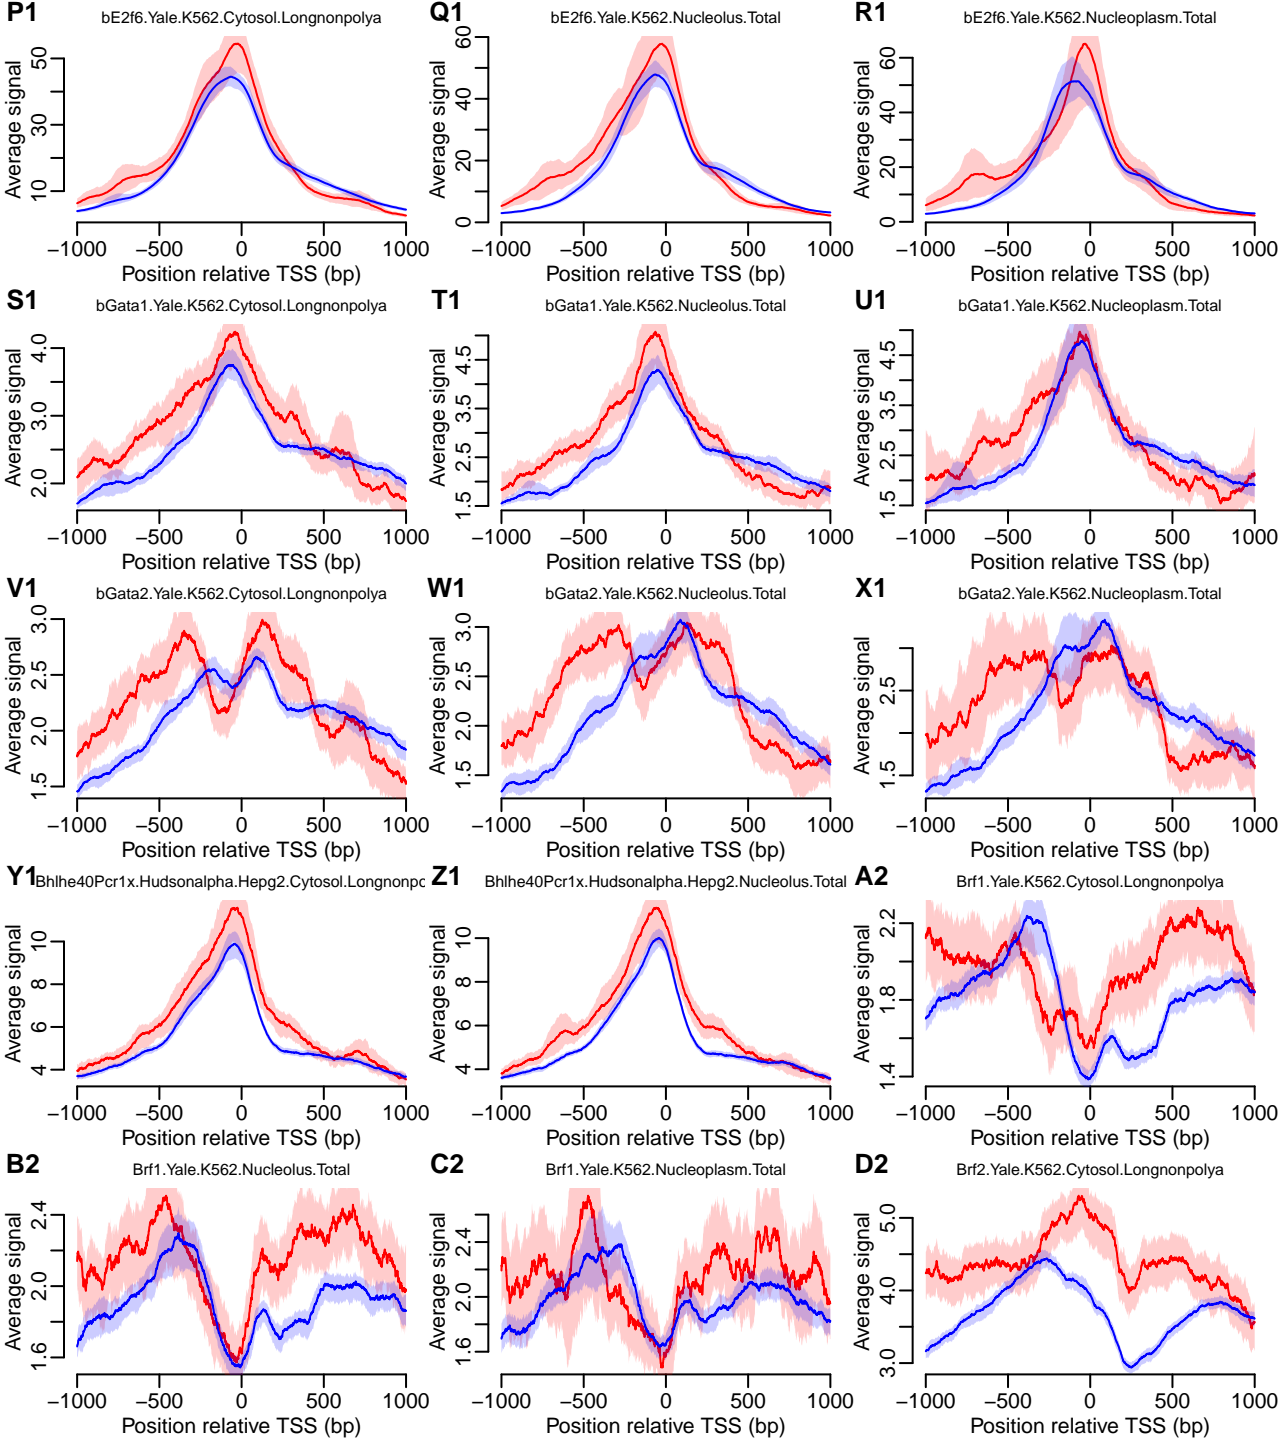

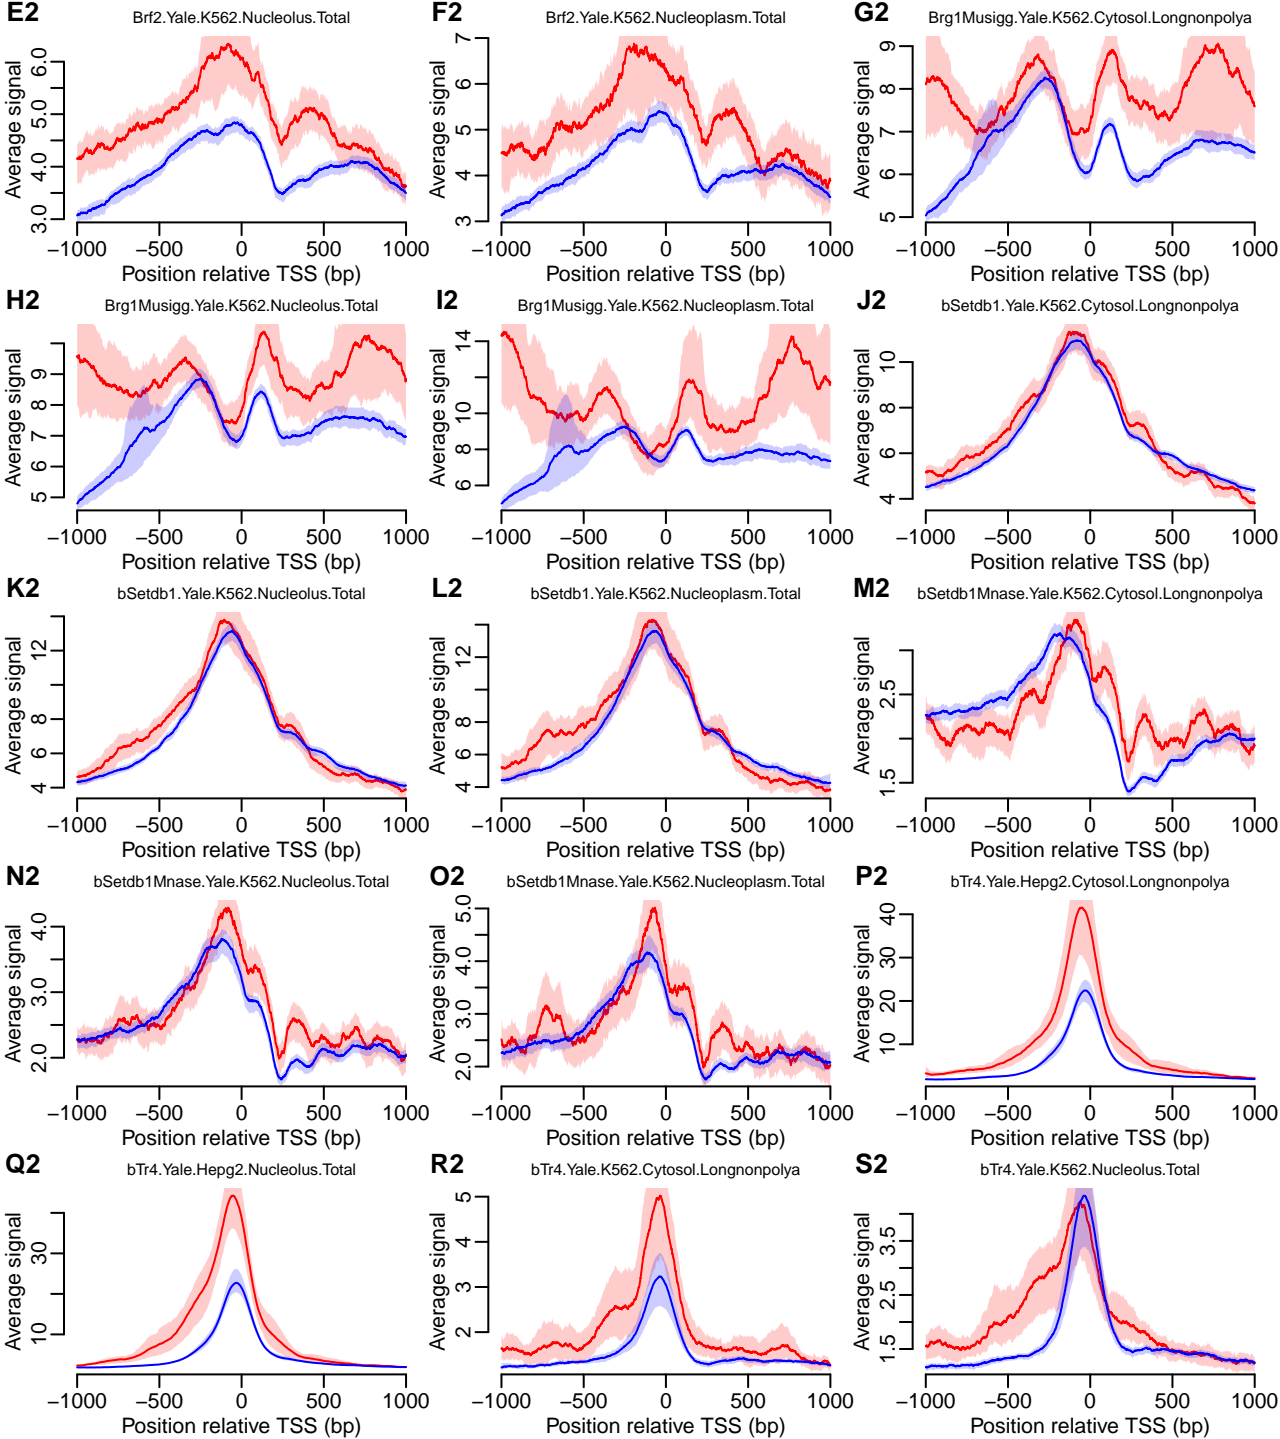

— Bidirectional genes

— Unidirectional genes

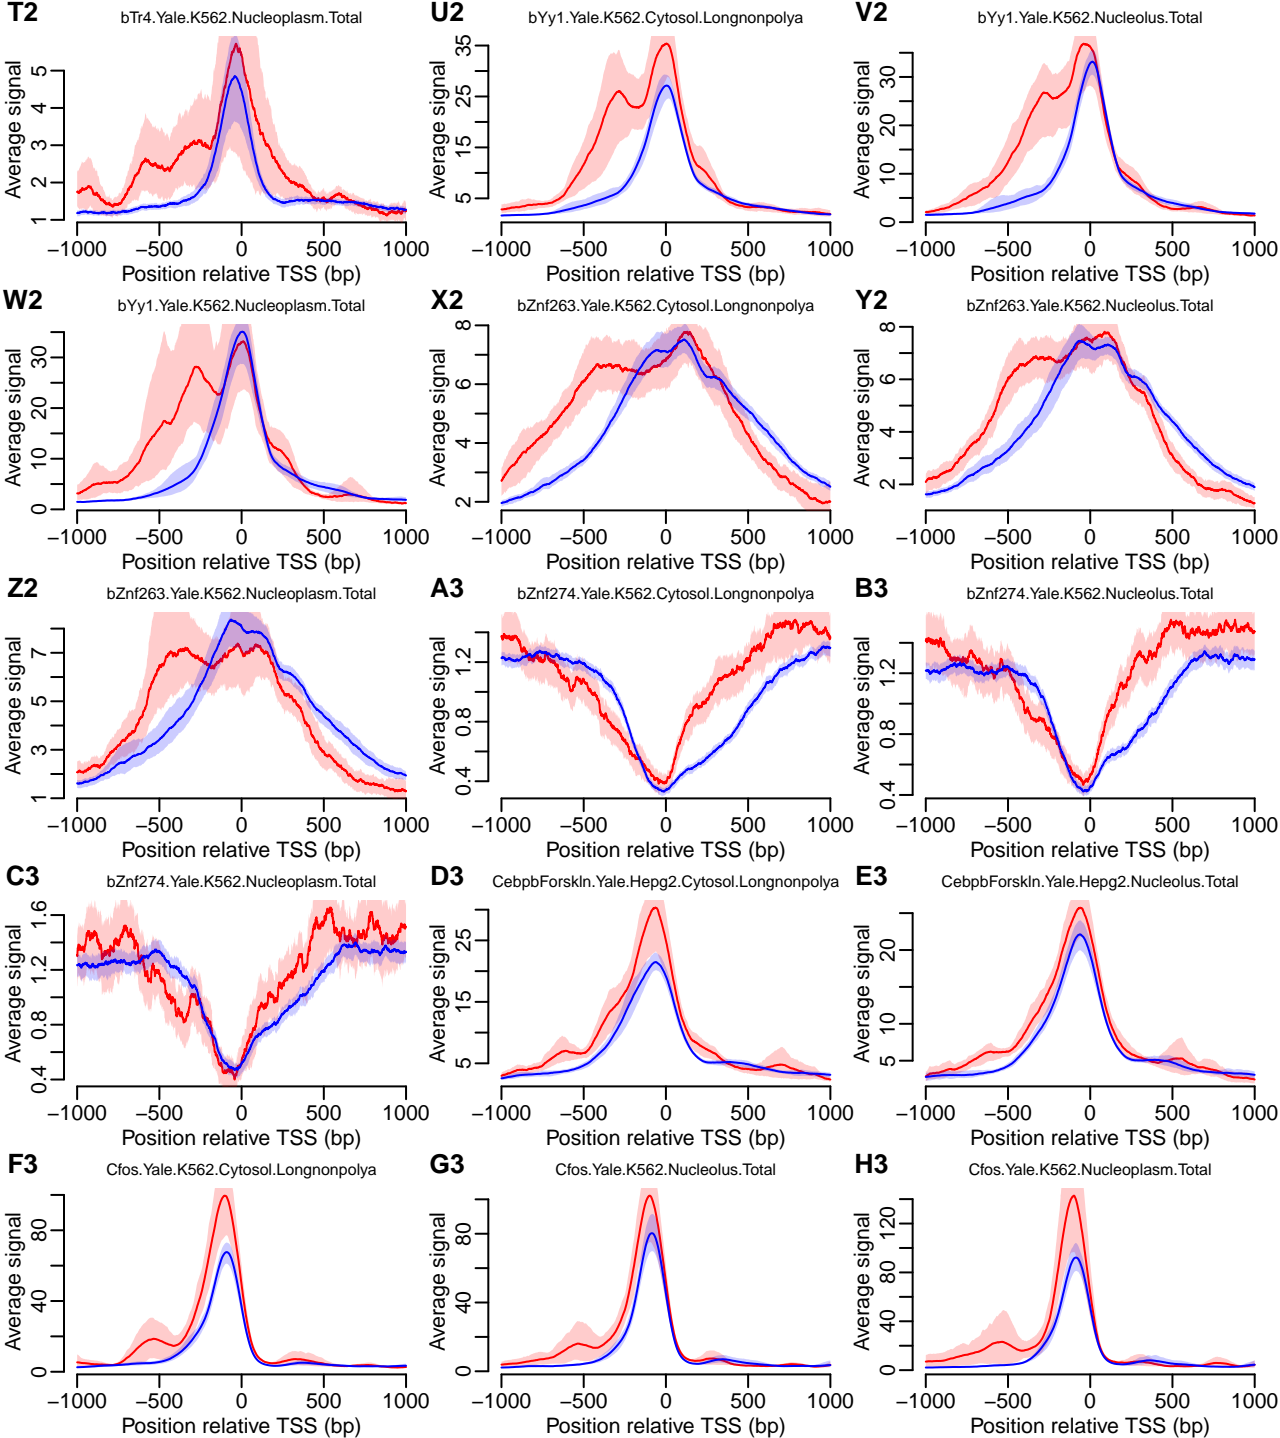

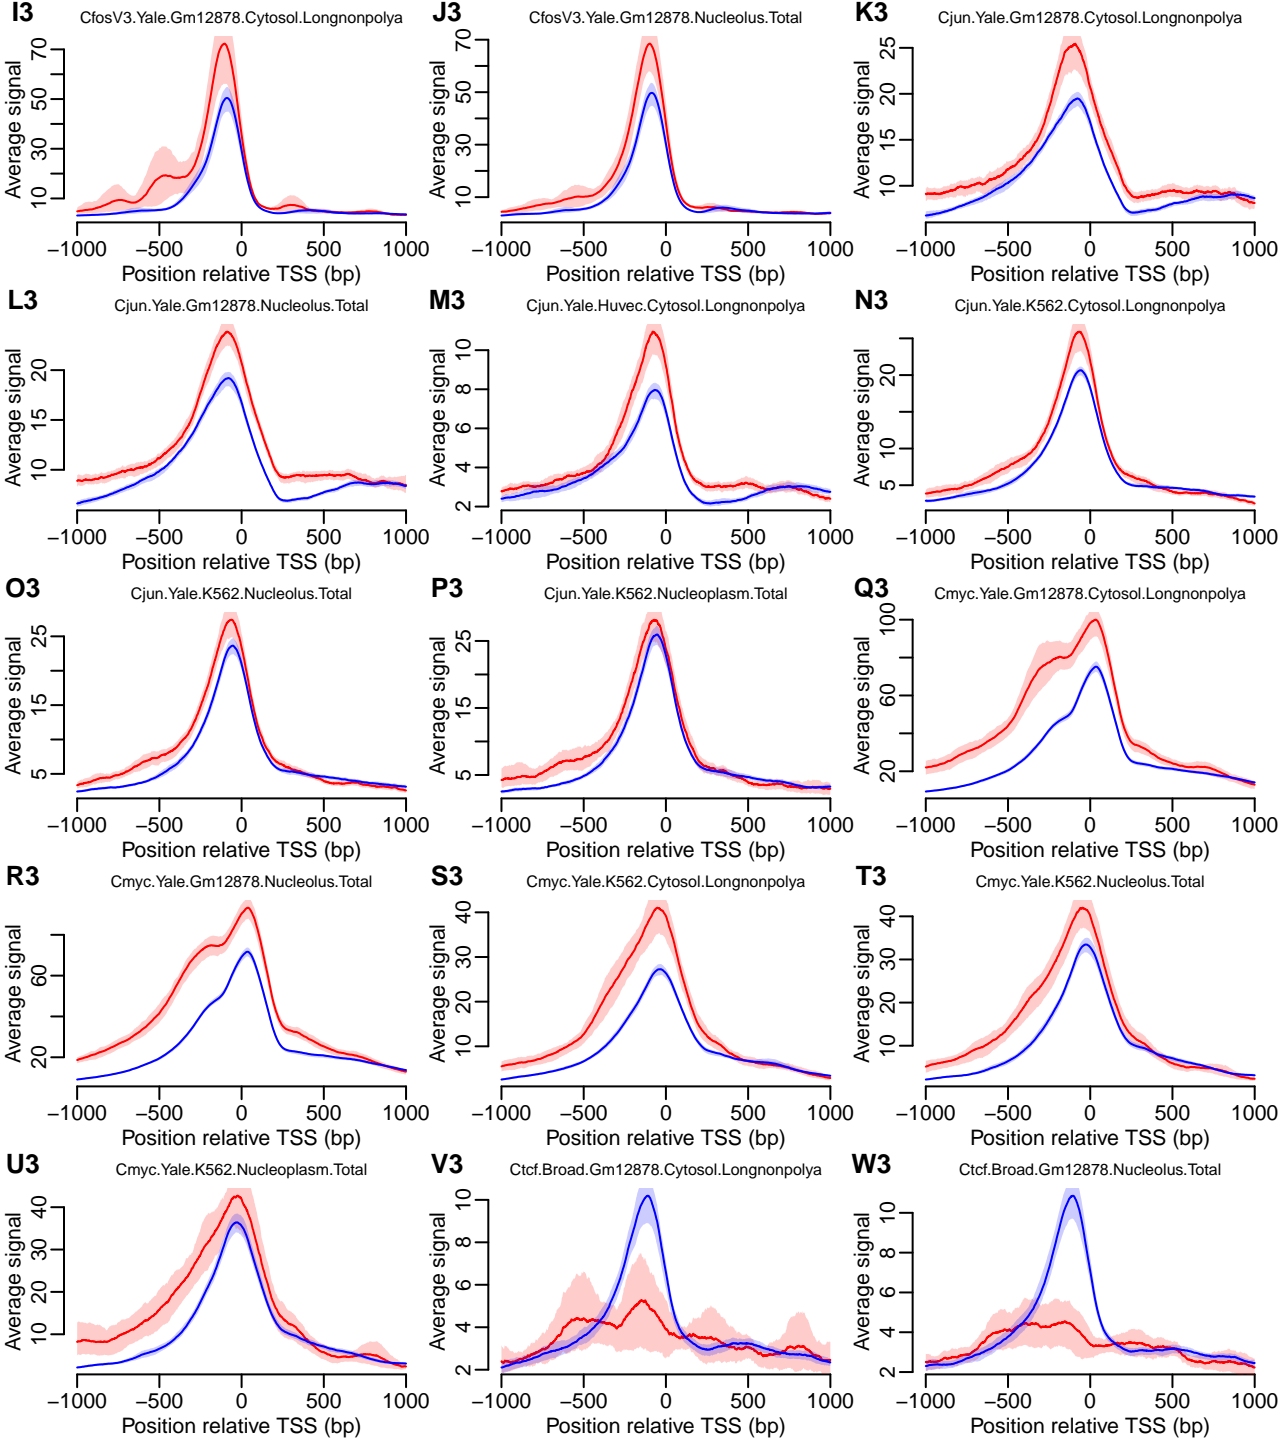

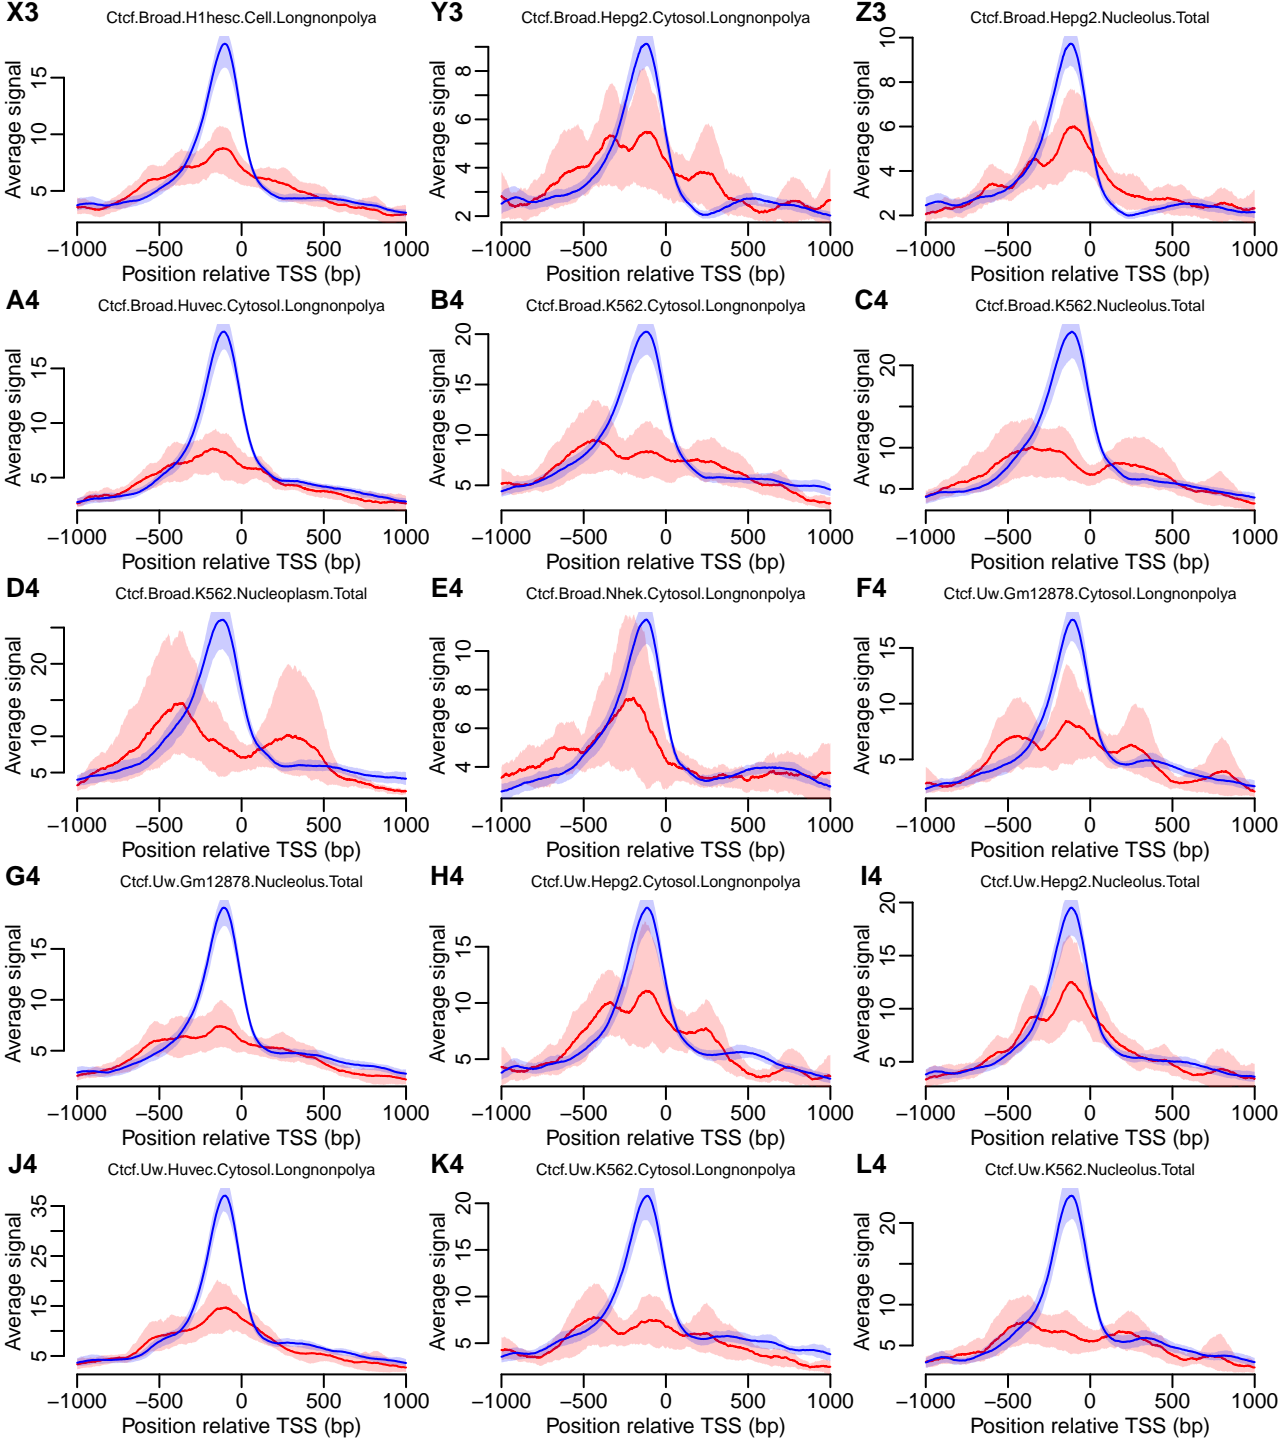

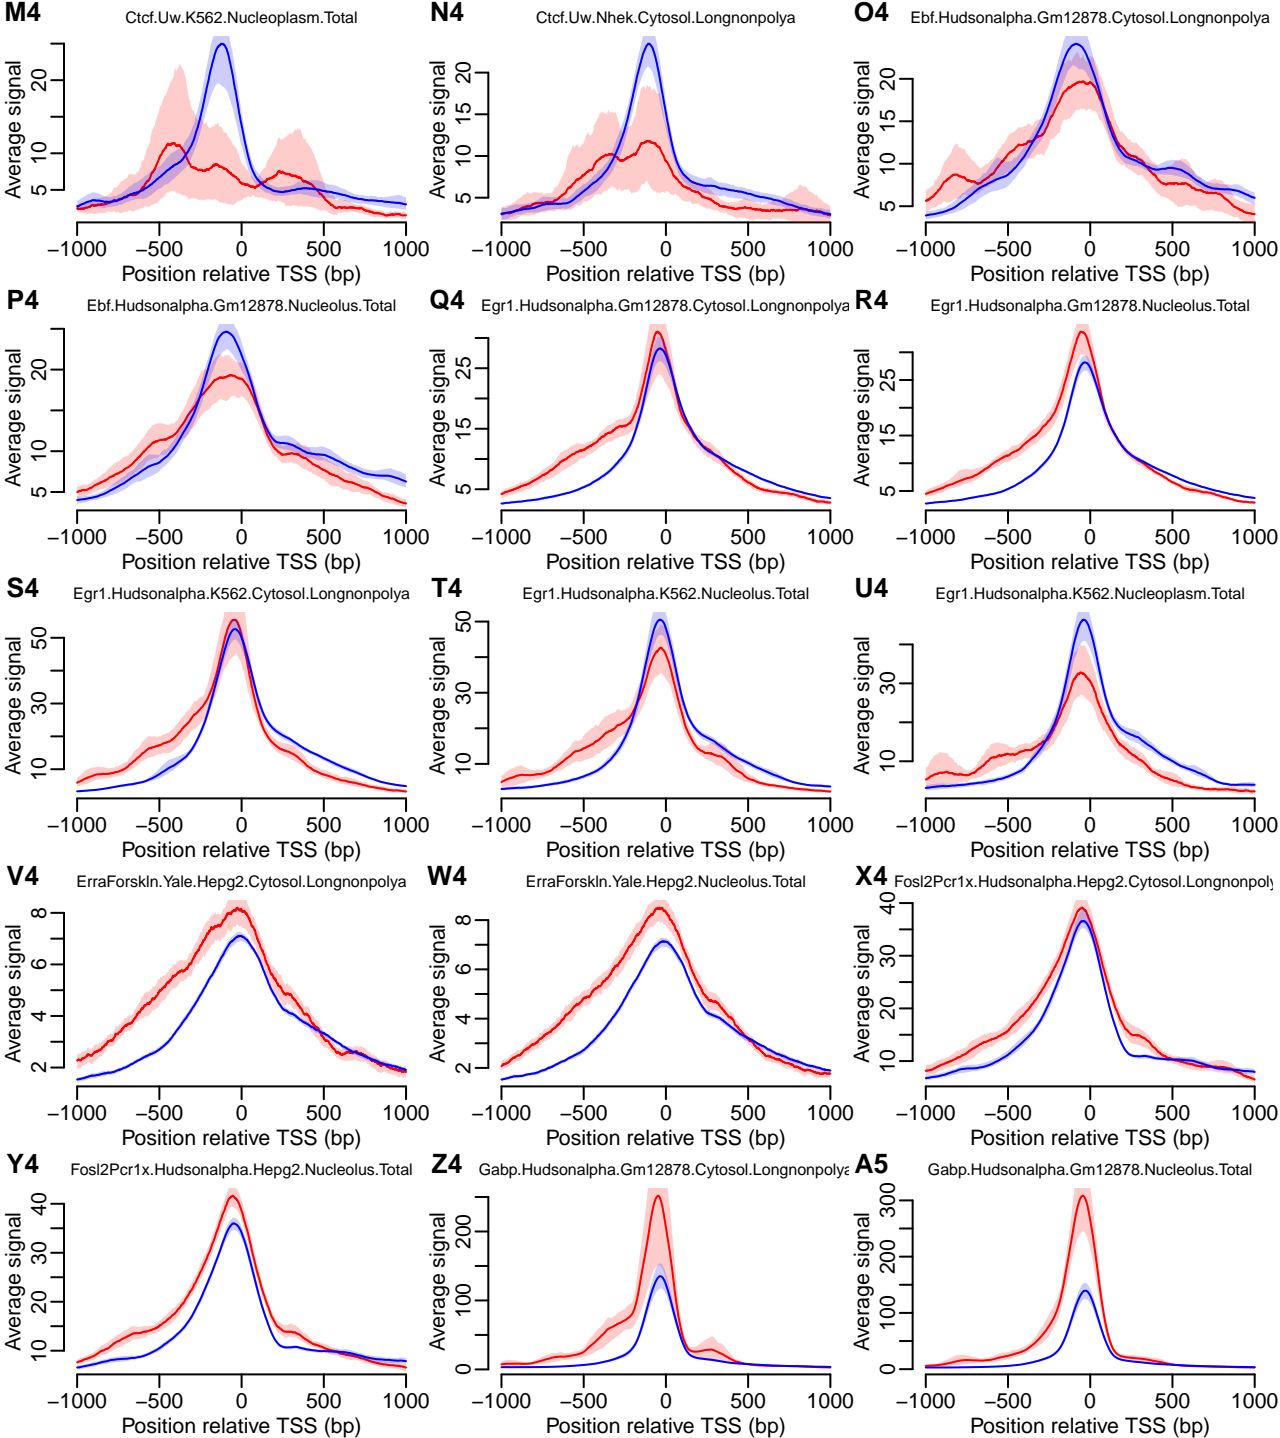

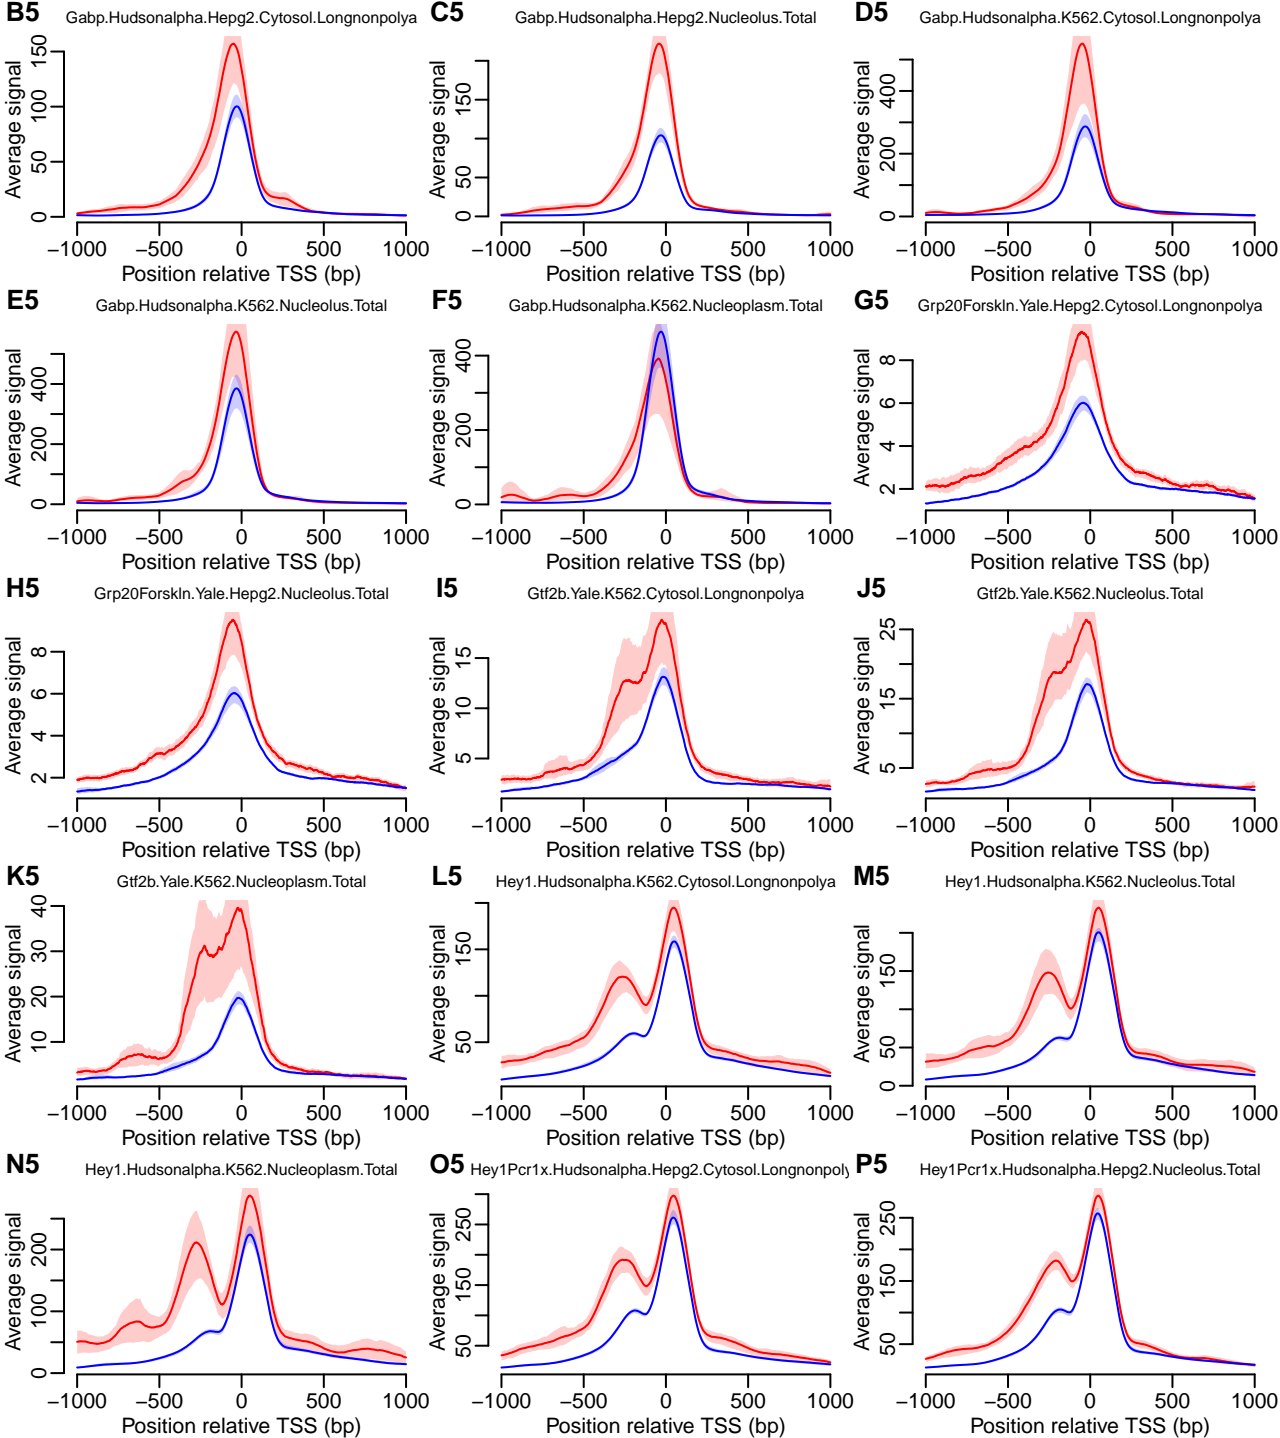



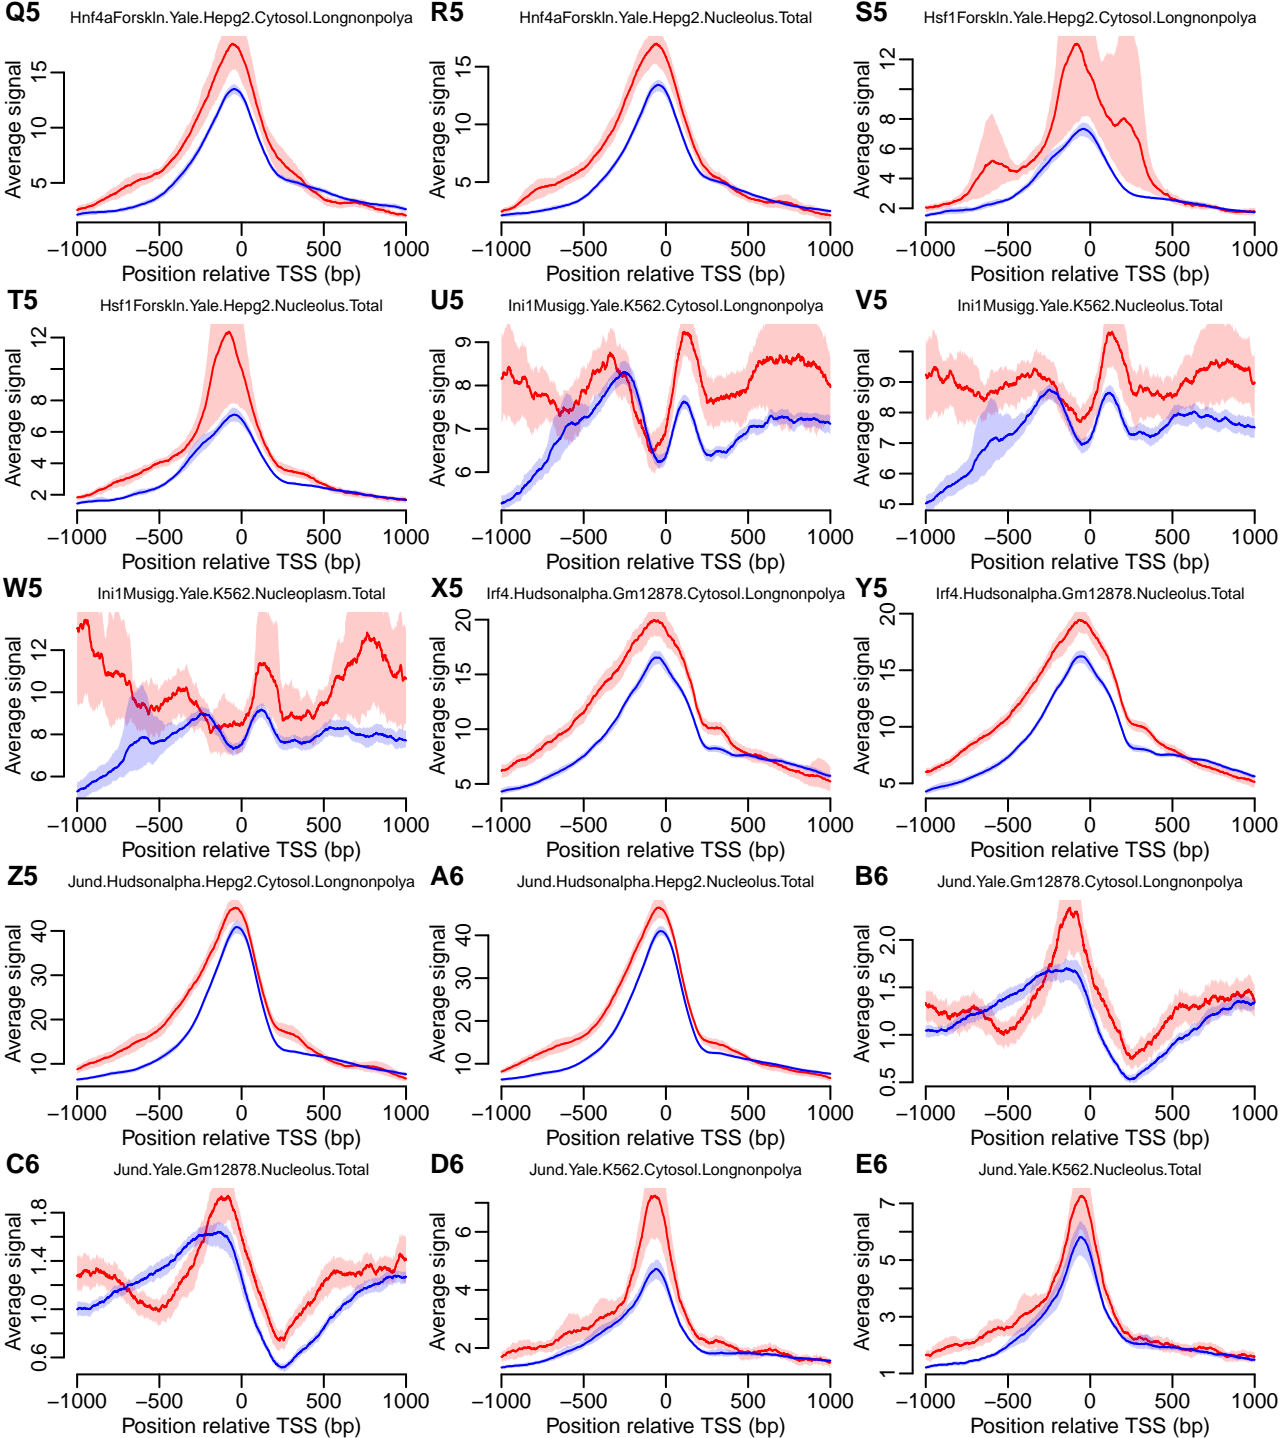

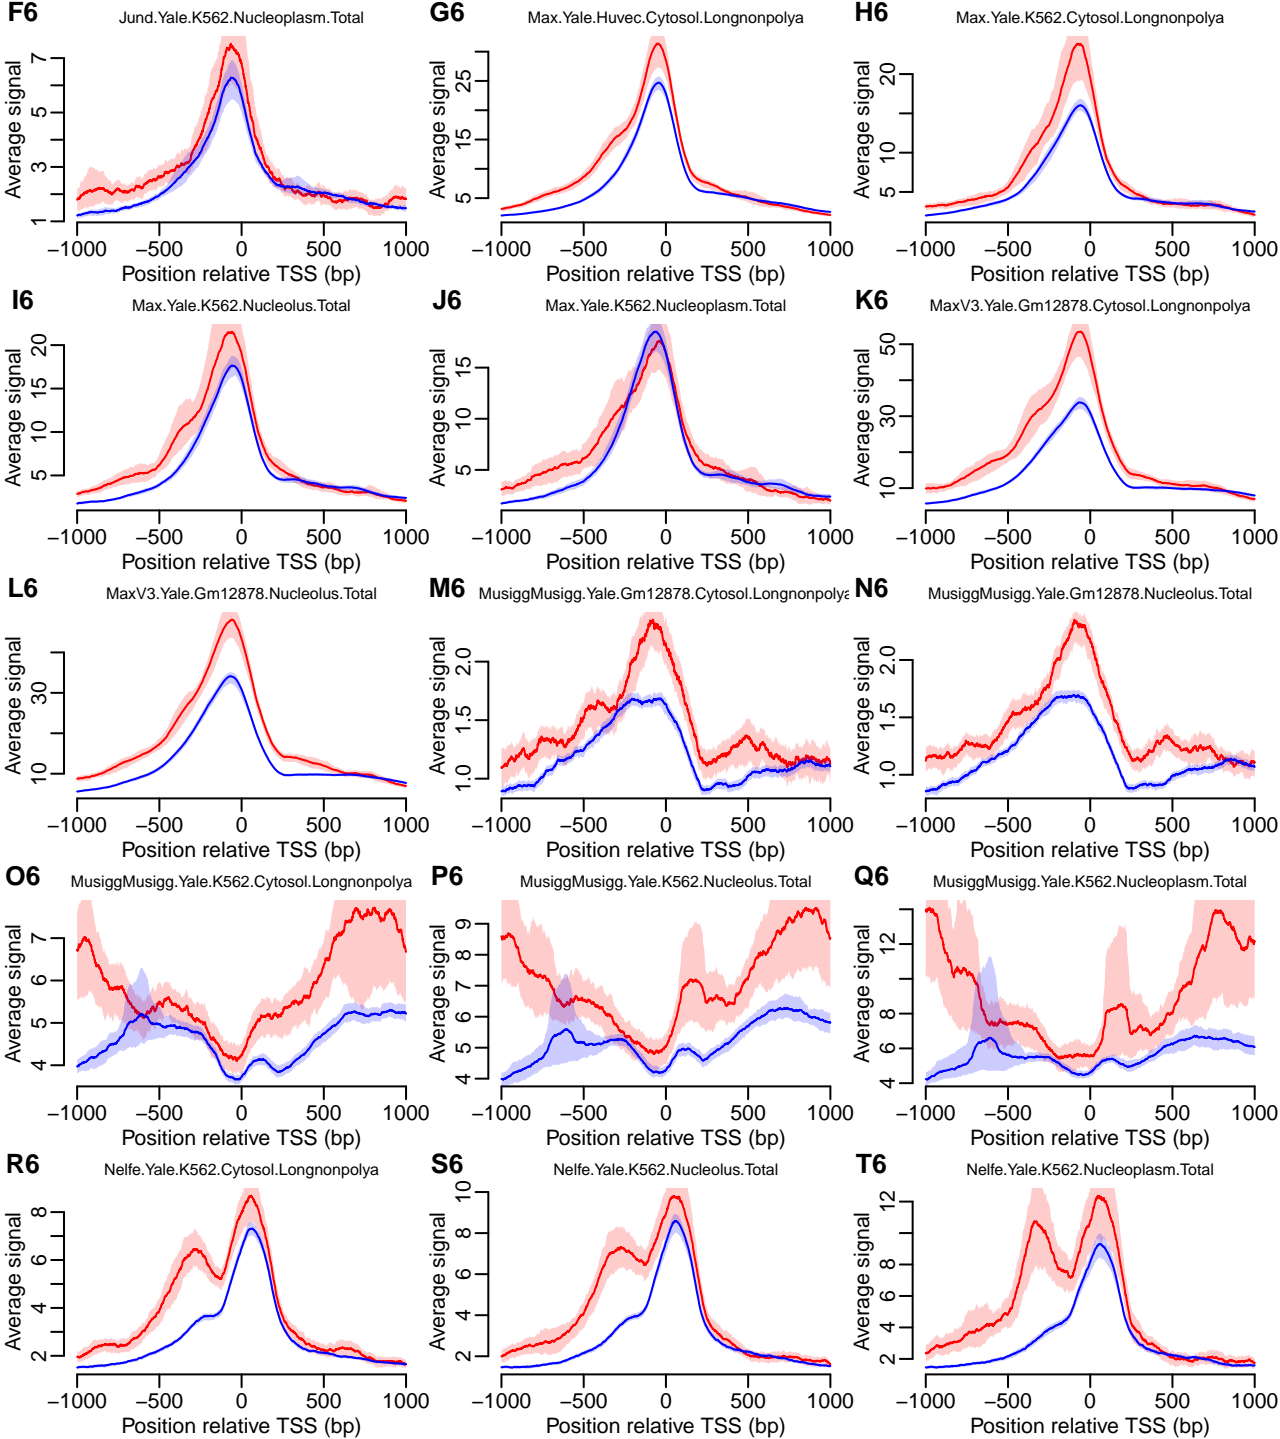

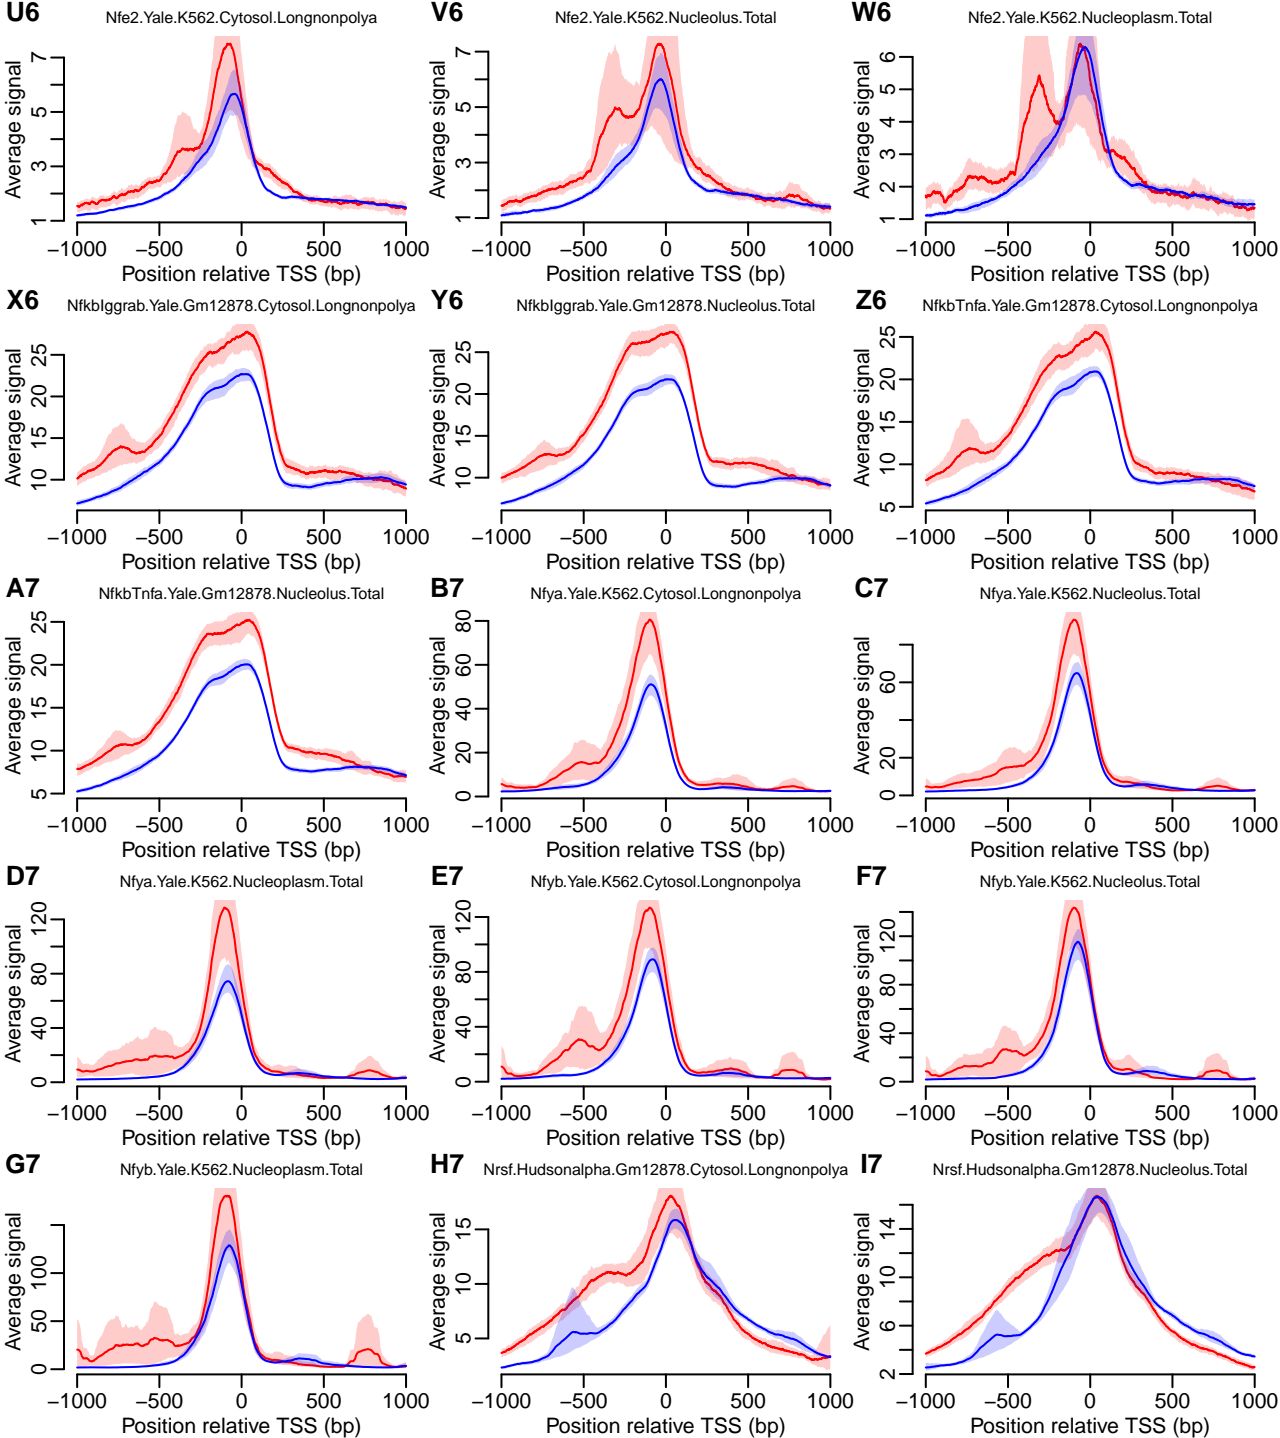

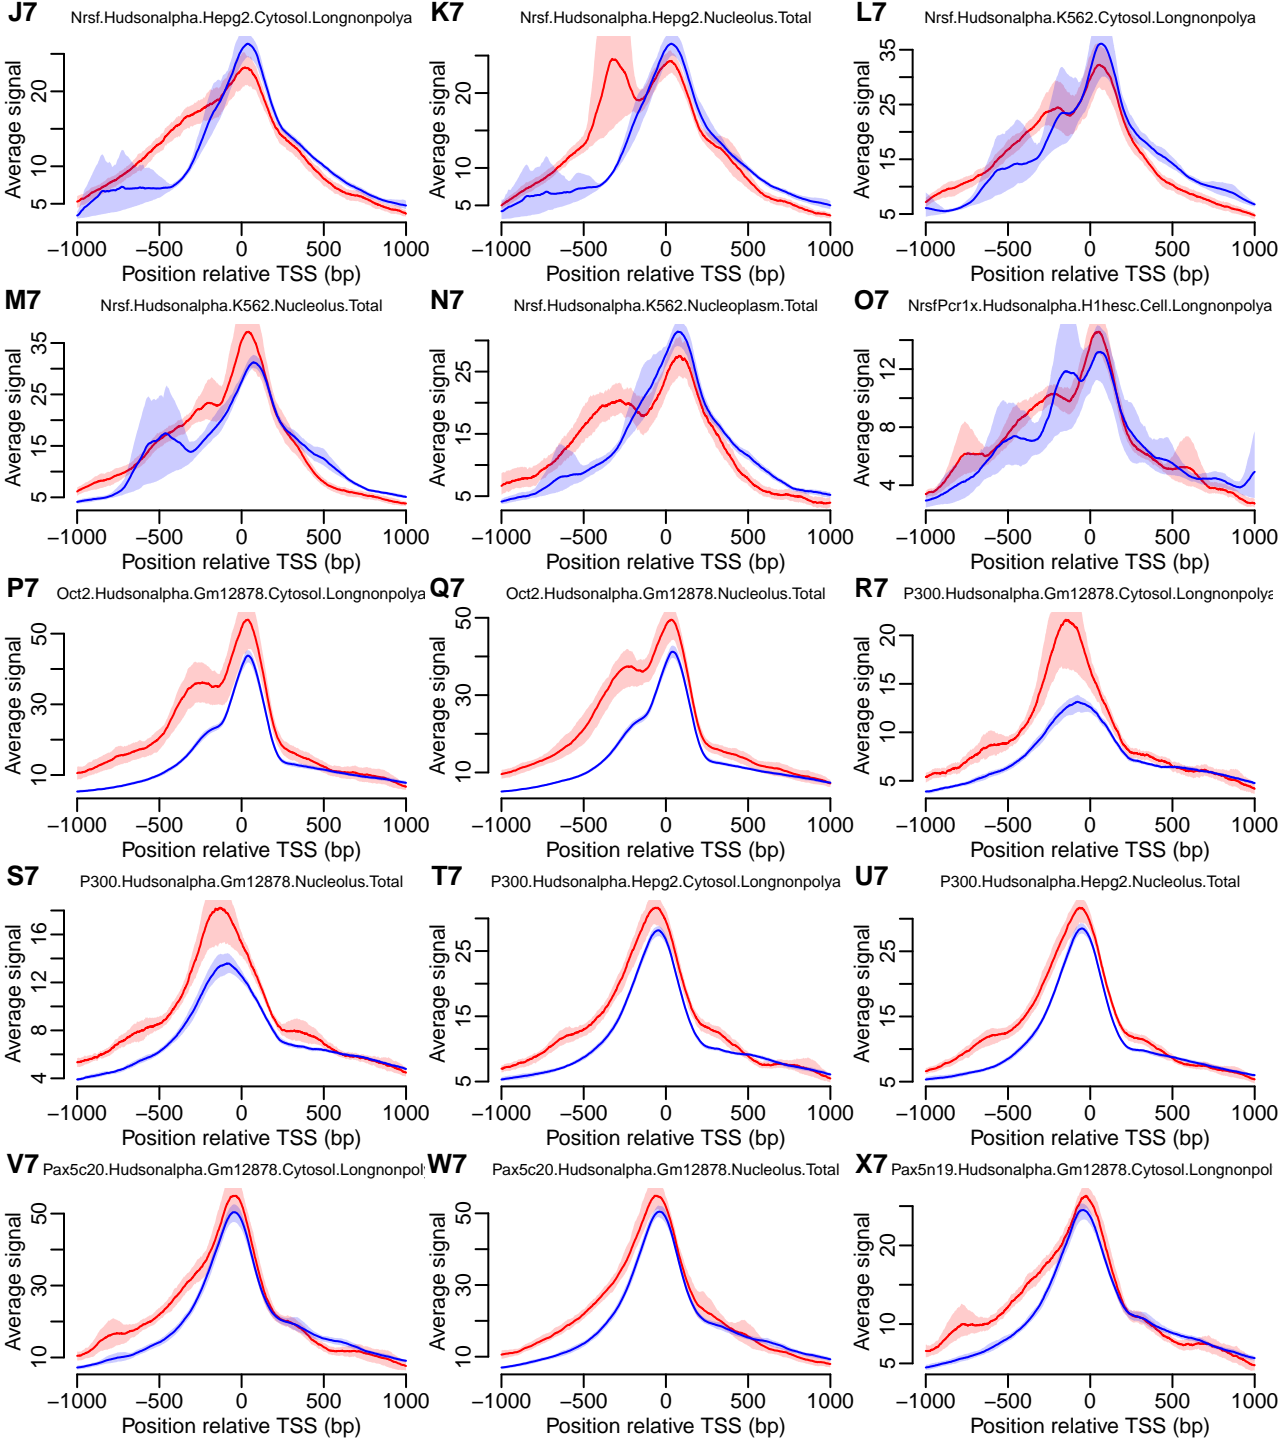

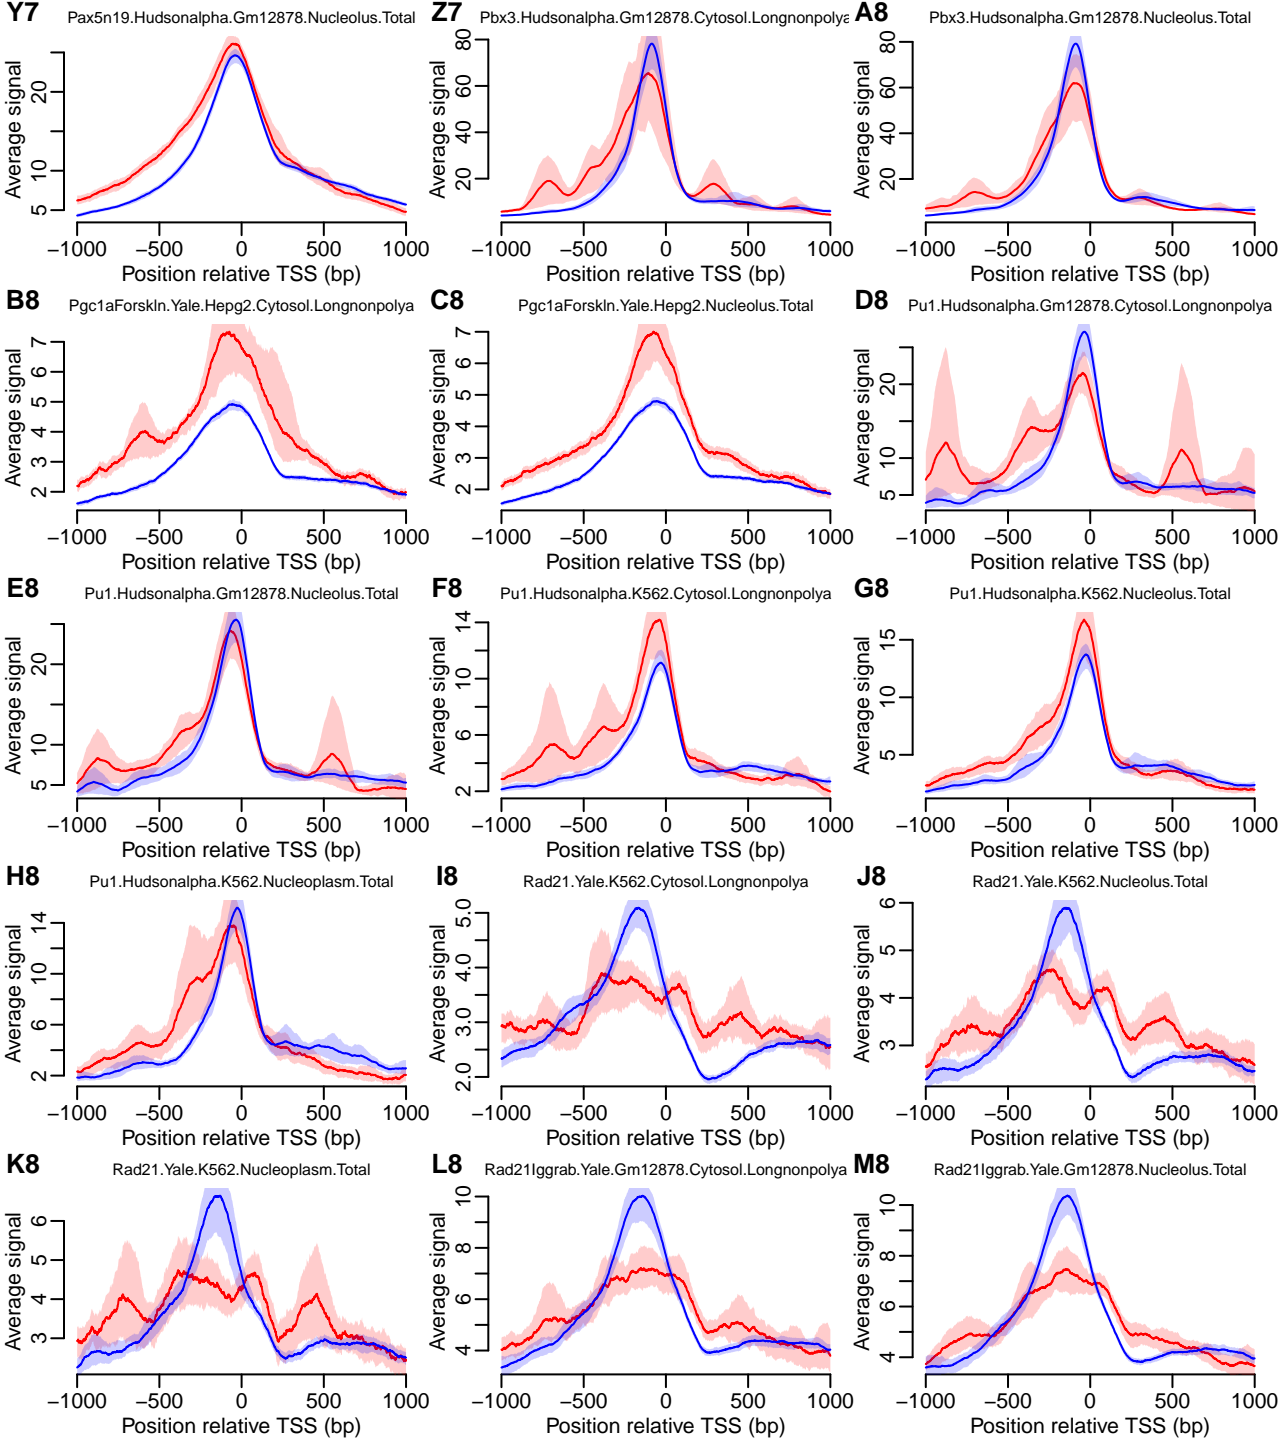

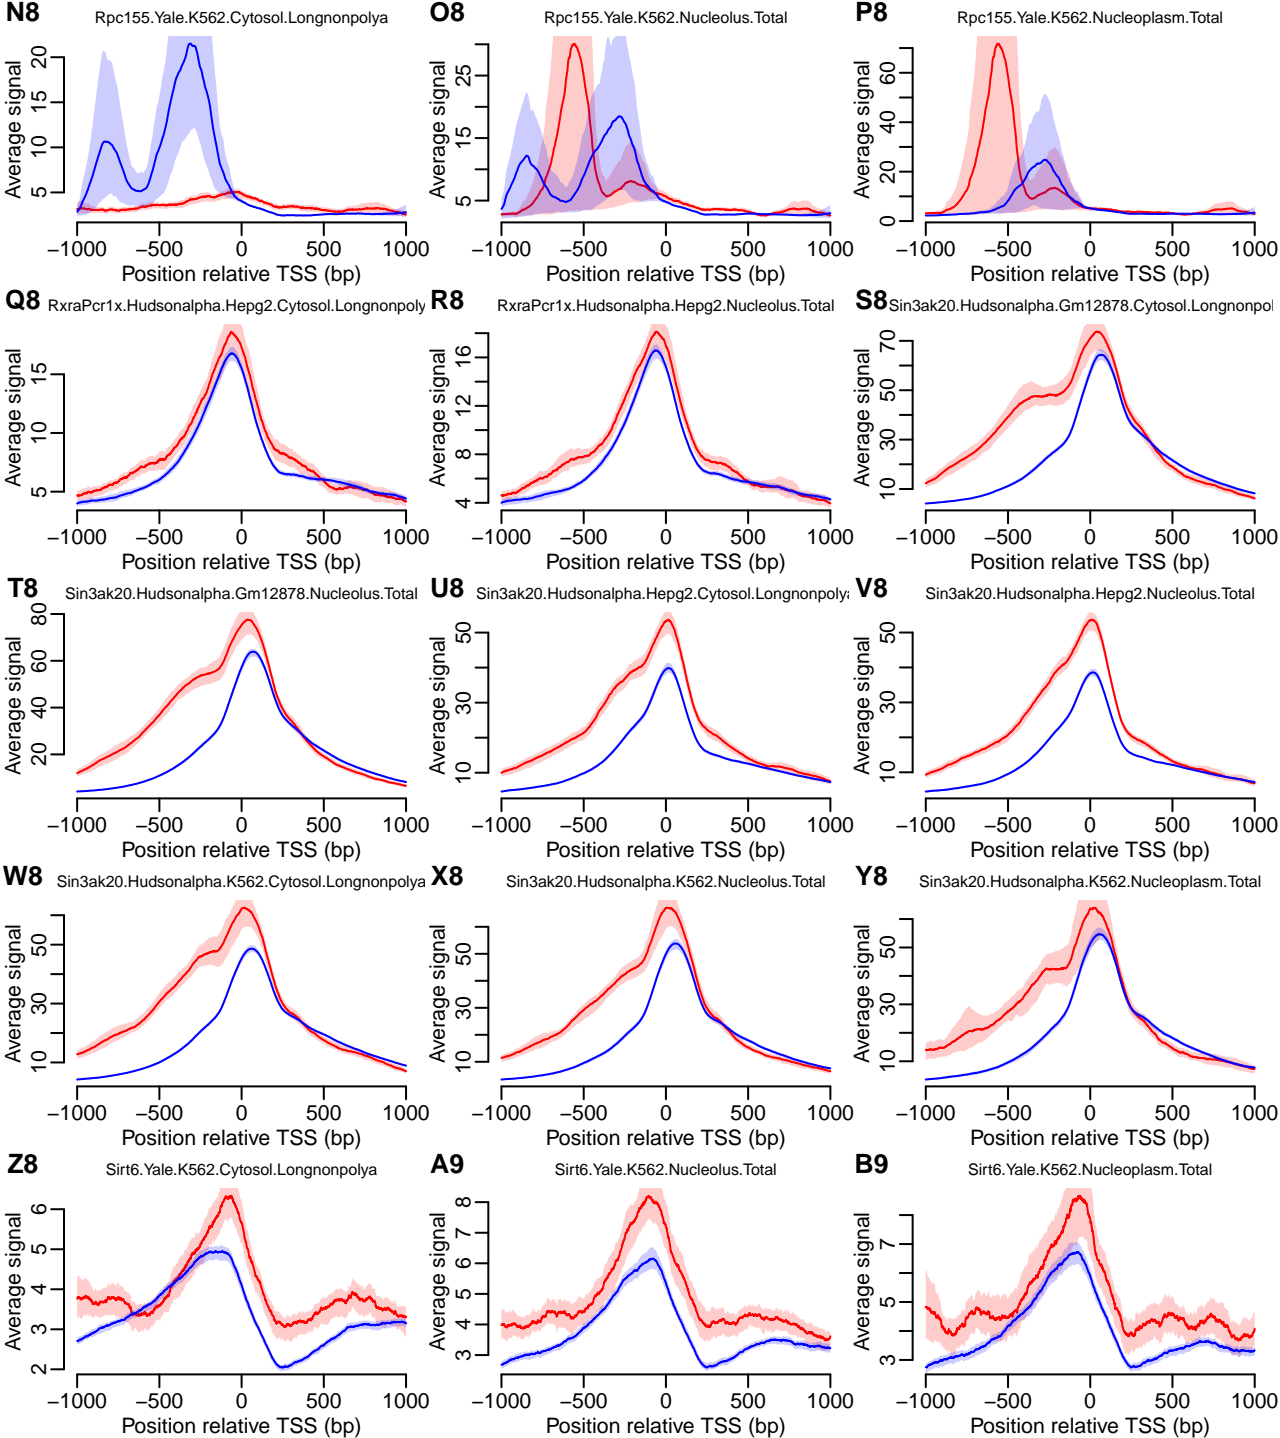

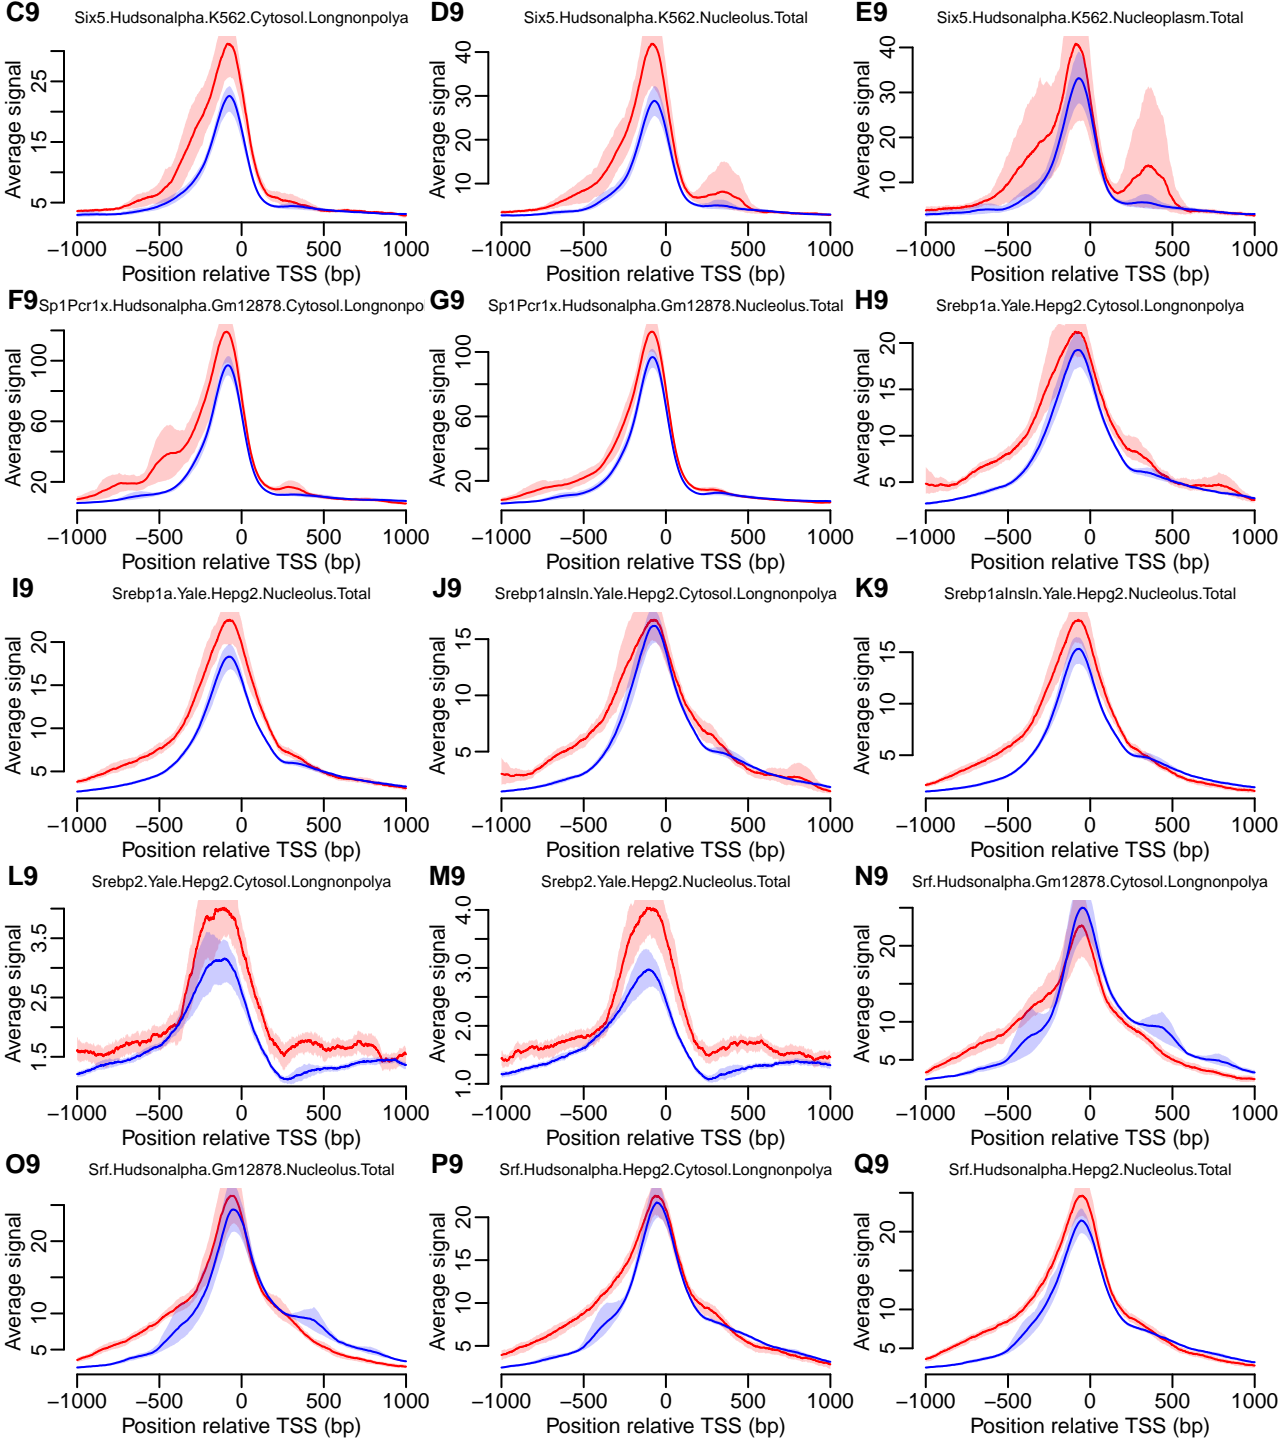

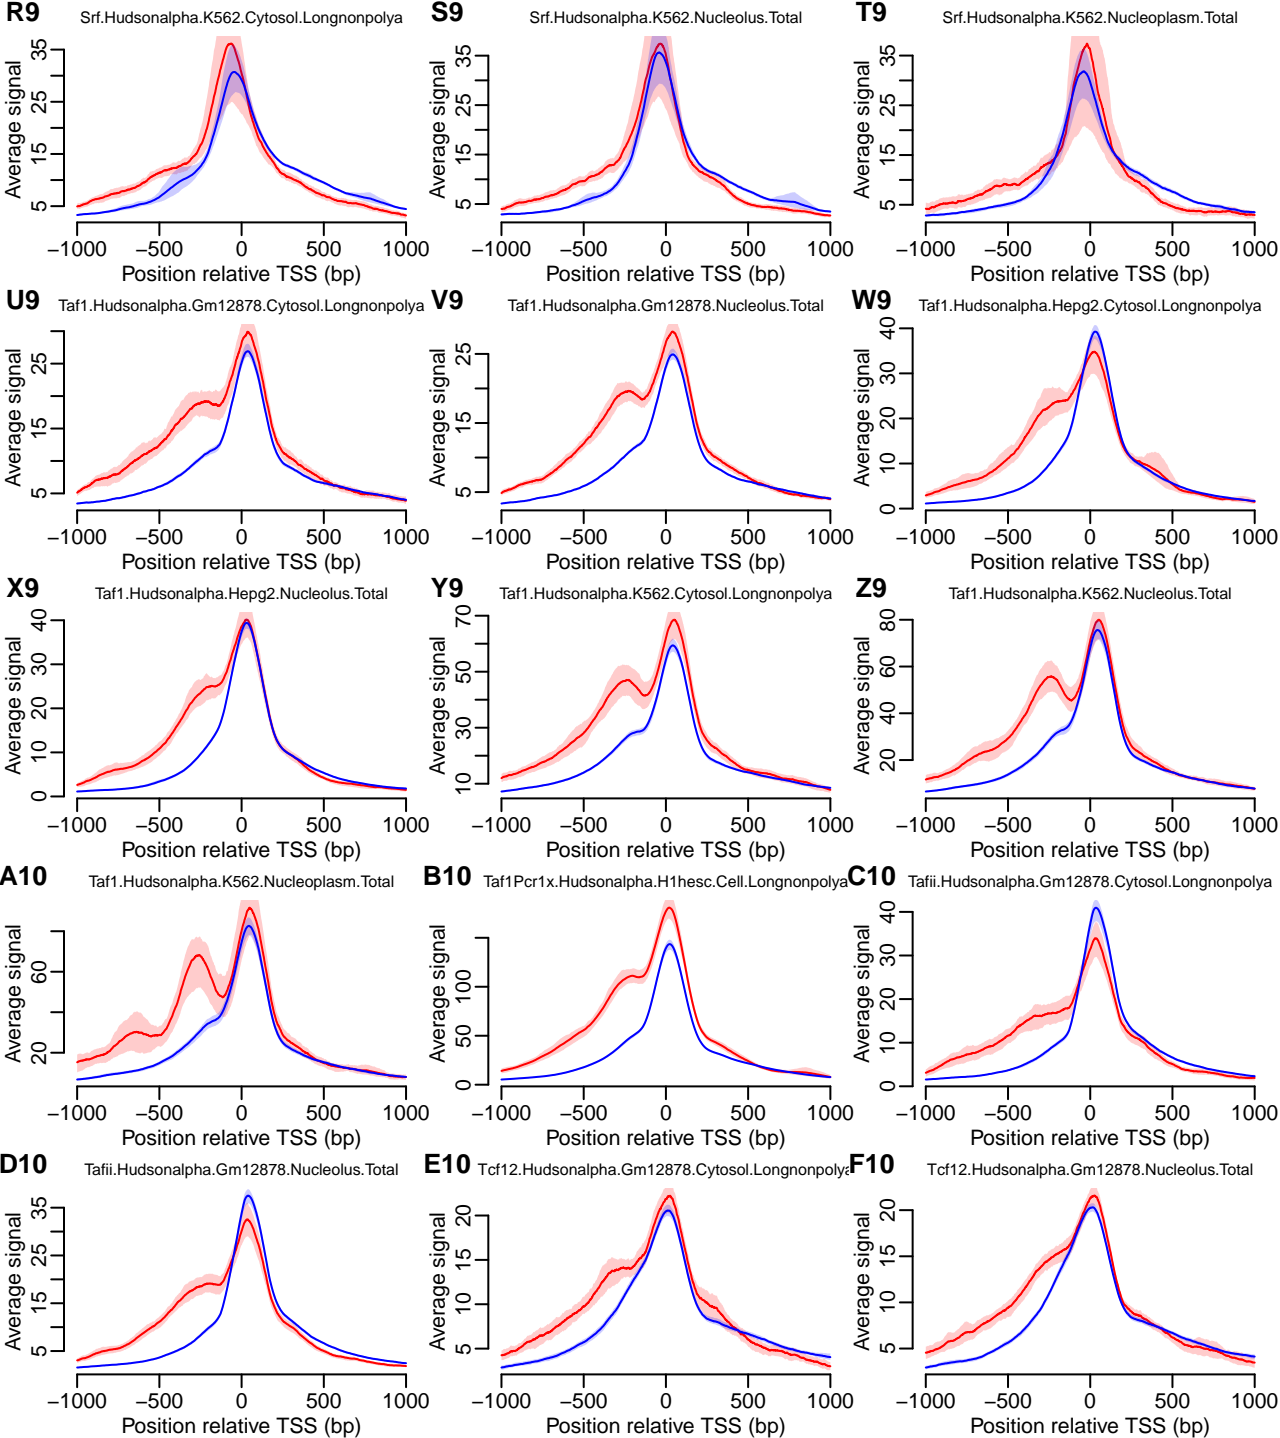



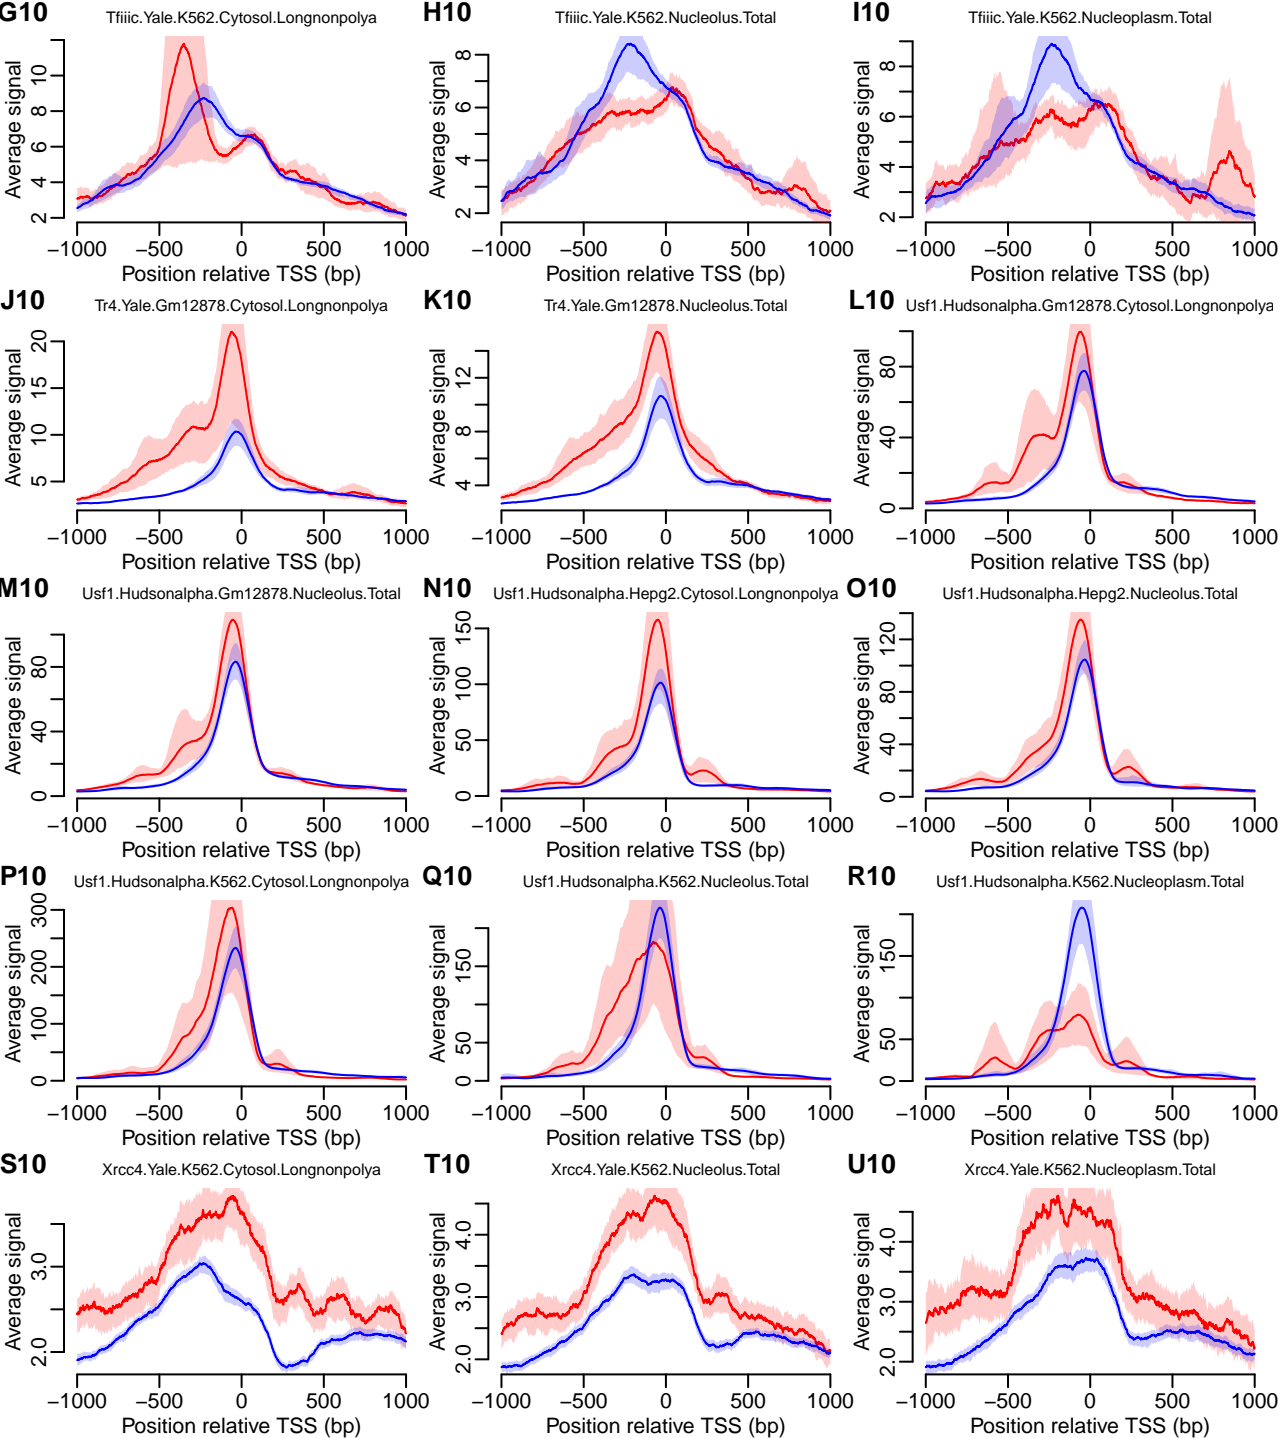

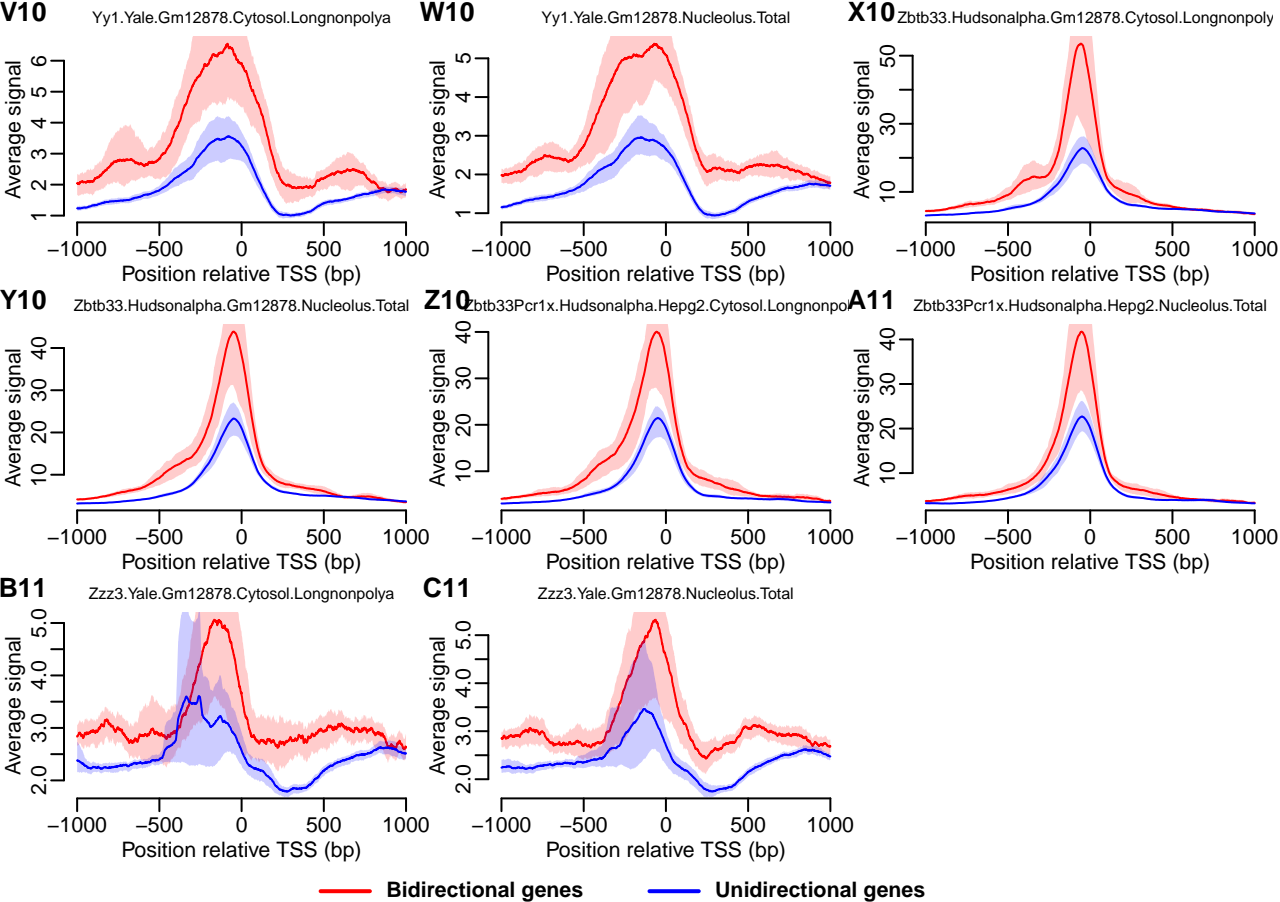

Supplement: 12864_2015_1485_MOESM4_ESM.pdf [file 12864_2015_1485_MOESM4_ESM.pdf]
